# Supplementary material
Source: Elsevier journal article supplement (https://www.sciencedirect.com/science/article/pii/S2173572721001090)
Supplement: mmc1 [file S2173572721001090:mmc1.pdf]

## **Anexo 1. Búsqueda bibliográfica, criterios.**

Se consideraron los artículos relativos a las complicaciones infecciosas asociadas a la infección por SARS-CoV-2 especialmente en pacientes en estado crítico ingresados en UCI.

La búsqueda bibliográfica se realizó utilizando la base de datos electrónica de PubMed utilizando los términos de los encabezados de sujeto médico (MeSH) : SARS-CoV-2 e infecciones como neumonía asociada a ventilación mecánica, bacteriemia, neumonía adquirida en la comunidad, infección del tracto urinario, aspergillus y, diferentes terapias, como dexametasona, tocilizumab, terapias inmunomoduladoras.

Un número considerable de artículos estaban en el idioma chino y no fueron incluidos.

Esto se complementó con listas de referencia de búsqueda manual para estudios adicionales y series de casos.
