# Supplementary material
Source: Elsevier journal article supplement (https://www.sciencedirect.com/science/article/pii/S2173572721001090)
Supplement: mmc2 [file S2173572721001090:mmc2.pdf]

## **Anexo 2: Recomendaciones adaptadas de los planes ZERO durante la pandemia por SARS-CoV-2**

1. Adaptación de la higiene de manos del personal sanitario en las UCI. La utilización de los equipos de protección individual (EPI) ha alterado el cumplimiento de las recomendaciones de higiene de manos. La respuesta de los hospitales ha sido muy heterogénea y no siempre respaldada por la evidencia científica. Mientras que el personal sanitario que trabaja en las UCI y que no lleva EPI tiene que cumplir la higiene de manos en el contacto con pacientes no COVID-19 siguiendo las normas publicadas por las OMS, se proponen cambios para mantener la autoprotección y la protección del paciente para el personal que lleva el EPI de forma continua, dependiendo del motivo de la higiene de manos (tabla 1 material suplementario).
2. Adaptación de las Recomendaciones de los Proyectos Zero. Para cada proyecto se detallan las adaptaciones de cada una de las recomendaciones. Destacan para todas ellas la formación del nuevo personal sanitario en los PZ, la disponibilidad de “kits” completos de inserción de catéter vascular y de sonda uretral, de material para la protección del personal sanitario, de sistemas de humidificación, de control continuo de la presión de neumotaponamiento, aspiración de secreciones subglóticas, tubuladuras desechables,..., así como listados de comprobación durante la inserción de dispositivos invasores o cumplimiento de tomas de muestras de vigilancia o normas de prevención de diseminación de bacterias multiresistentes.

## **Tabla 1 Material suplementario: Recomendaciones sobre higiene de manos en la atención de pacientes críticos con infección por SARS COV 2**

### **1.a. Realización programada de una técnica invasora.**

- Antes de realizar una técnica invasiva programada hacer higiene quirúrgica de manos. Si es posible, antes de colocarse el EPI. Si no es posible, retirar los guantes del equipo EPI (siguiendo las recomendaciones de retirada), realizar la higiene de manos quirúrgica (con agua y jabón antiséptico o con PBA), colocarse nuevos guantes estériles y realizar la técnica.
- Posteriormente proceder a la retirada de los guantes estériles, higiene de manos con PBA y recolocación de nuevos guantes del equipo EPI.

### **1.b. Contacto programado con el paciente o con su entorno ambiental.**

- En las manipulaciones programadas no invasivas colocar otros guantes limpios no estériles sobre los guantes de los equipos EPI durante el tiempo que dure la asistencia.
- No utilizar PBA, de forma rutinaria, sobre los guantes de los equipos EPI para su desinfección.

**1.c. Asistencia urgente al paciente o contacto con su entorno por una situación de riesgo vital** en la que es posible la manipulación de dispositivos invasores (catéteres, sondas, drenajes,...). En estos casos, fricción de los guantes del equipo EPI con PBA seguido de la colocación de guantes estériles encima de los guantes del EPI durante el breve tiempo que dure la asistencia. Finalizada la asistencia, retirada de ambos guantes, higiene de manos y colocación de nuevos guantes del equipo EPI.
